# Supplementary material
Source: publisher site journal article supplement (https://www.spandidos-publications.com/1544/downloadSupplementary)
Supplement: Supplementary file 1 [file downloadSupplementary]

## Sheet: Table SII
Table SII. Total RNA reads and mapped reads in each group
Sample name	Total reads	Total mapped	Multiple mapped	Uniquely mapped
si-NS 1	49093462	40,397,095 (82.29%)	702,599 (1.43%)	39,694,496 (80.85%)
si-FAM83A 1	53280548	43,613,845 (81.86%)	623,552 (1.17%)	42,990,293 (80.69%)
si-NS 2	46204994	38,024,498 (82.3%)	637,028 (1.38%)	37,387,470 (80.92%)
si-FAM83A 2	47146334	38,739,273 (82.17%)	572,884 (1.22%)	38,166,389 (80.95%)
si-NS 3	45336772	37,526,246 (82.77%)	640,962 (1.41%)	36,885,284 (81.36%)
si-FAM83A 3	44228718	36,582,926 (82.71%)	555,403 (1.26%)	36,027,523 (81.46%)
FAM83A, family with sequence similarity 83 member A; si, small interfering RNA; NS, scrambled control.
